# Supplementary material for: The external PASTA domain of the essential serine/threonine protein kinase PknB regulates mycobacterial growth
Source: PubMed Central journal article supplement (PMC4632501; doi:10.1098/rsob.150025), 2015-07-01
Supplement: rsob150025supp2.pdf [file rsob150025supp2.pdf]

**Table S1.** Plasmids and strains generated for over-expression studies

| <b>Plasmid Name</b> | <b>Strain Name</b> | <b>Insert Size (bp)</b> | <b>Primers</b>     | <b>Description</b>       |
|---------------------|--------------------|-------------------------|--------------------|--------------------------|
| pMind- <i>pknB1</i> | PknB1              | 1881                    | PknBF1 & PknBR1    | Full length gene         |
| pMind <i>pknB5</i>  | PknB5              | 1062                    | PknBF1 & PknBR5-TM | $\Delta$ PASTA 1-4       |
| pMind <i>pknB7</i>  | TMP                | 888                     | PknBF2 & PknBR1    | TM-PASTA1-4              |
| pMind <i>pknB9</i>  | PknB9              | 72                      | PknBF2 & PknBR5-TM | TM only                  |
| pMind <i>pknB10</i> | PknB10             | 276                     | PknBF2 & PknBR4-P  | TM-PASTA1                |
| pMind <i>pknB11</i> | PknB11             | 480                     | PknBF2 & PknBR3-2P | TM-PASTA1-2              |
| pMind <i>pknB12</i> | PknB12             | 684                     | PknBF2 & PknBR3-3P | TM-PASTA1-3              |
| pMind <i>pknB13</i> | PknB13             | 819                     | PknBF3 & PknBR1    | PASTA 1-4                |
| pMind <i>pknB14</i> | PknB14             | 879                     | PknBF3 & MycHisR   | PASTA 1-4-MycHis-tag     |
| pMind <i>pknB15</i> | TMPH               | 951                     | PknBF1 & PknBHR2   | TM-PASTA1-4- Myc-His-tag |
| pMind               | MIND               | N/A                     | N/A                | Empty plasmid control    |

**Table S2.** Primers used in the study

| <b>N</b> | <b>Primer</b> | <b>Sequence 5'-3'</b>                        | <b>Description</b>                           |
|----------|---------------|----------------------------------------------|----------------------------------------------|
| 1.       | PknBF1        | GATGGATCCATGACCACCCCTTCCCACCTGTCC            | Cloning of <i>pknB</i> in pMind plasmid      |
| 2.       | PknBF2        | GACGGATCCATGCGTTGGGTTGCGGTGGTC               | Cloning of <i>pknB8</i> in pMind plasmid     |
| 3.       | PknBF3        | GCAGGATCCATGGGC GGCATCACCCGCGACGTTCAA        | Amplification pknB10                         |
| 4.       | PknBR1        | CGGACTAGTCTACTG GCC GAA CCT CAG CGT GAT      | Cloning of <i>pknB</i> in pMind plasmid      |
| 5.       | PknBR4-P      | TTGACTAGTCTATCC GGT GGA CAC GTT GAC TGT      | Cloning of <i>pknB</i> in pMind plasmid      |
| 6.       | PknBR5-TM     | GGTACTAGTCTAGCC GAA CGT GTT GAT GGC GAT      | Cloning of <i>pknB</i> in pMind plasmid      |
| 7.       | PknBHR2       | CGGACTAGTCTA ACG CGT CTG GCC GAA CCT CAG CGT | Cloning of <i>pknB</i> in pMind plasmid      |
| 8.       | Myc-HisF      | GCA ACG CGT GAA CAA AAA CTC ATC TCA          | Amplification of 6XHis-Myc tag               |
| 9.       | Myc-HisR      | GCG ACT AGT TAA TCT GTA TCA GGC GAA          | Amplification of 6XHis-Myc tag               |
| 10.      | MindF2        | TGAGTCATAGTTGCACTTTATCAT                     | Sequencing of pMind constructs               |
| 11.      | MindR3        | TCCGAATCAATACGGTTCGAGA                       | Sequencing of pMind constructs               |
| 12.      | PknBR2-3P     | CGGACTAGT CTA CTCTGGACACCTGTAGTTC            | Cloning of <i>pknB12</i> in in pMind plasmid |
| 13.      | PknBR3-2P     | CGGACTAGTCTA GCCAACGATGATGAT                 | Cloning of <i>pknB11</i> in in pMind plasmid |
| 14.      | RT-PknBF1     | TCAGAACGGAATCATCCACCGTGA                     | qRT-PCR                                      |
| 15.      | RT-PknBR1     | GCGATGCCGAAATCCATCACCTTT                     | qRT-PCR                                      |
| 16.      | RT-PknBF2     | AGAACCTCAACGTCTACGGCTTCA                     | qRT-PCR                                      |
| 17.      | RT-PknBR2     | ATGACGAATTGGTTGCCCTTGAC                      | qRT-PCR                                      |

**Table S3.** Growth of *M. smegmatis* strains over-expressing *pknB* variants

| Sauton's medium |                                        |               |                     | Lysogeny broth                         |               |                     | Middlebrook 7H9 medium                 |               |                     |
|-----------------|----------------------------------------|---------------|---------------------|----------------------------------------|---------------|---------------------|----------------------------------------|---------------|---------------------|
| Strain          | Maximum growth rate (h <sup>-1</sup> ) | Lag-phase (h) | OD <sub>600nm</sub> | Maximum growth rate (h <sup>-1</sup> ) | Lag-phase (h) | OD <sub>600nm</sub> | Maximum growth rate (h <sup>-1</sup> ) | Lag-phase (h) | OD <sub>600nm</sub> |
| Mind            | 0.12±0.010                             | 22±2.2        | 1.46±0.10           | 0.28±0.015                             | 21±2.2        | 1.14±0.15           | 0.12±0.010                             | 16±1.7        | 0.75±0.12           |
| PknB1           | 0.11±0.010                             | 52±4.0        | 1.10±0.12           | 0.09±0.002                             | 55±4.4        | 0.98±0.16           | 0.06±0.005                             | 32±2.7        | 0.54±0.15           |
| PknB5           | 0.12±0.010                             | 46±4.0        | 1.50±0.15           | 0.11±0.008                             | 47±4.2        | 1.04±0.18           | 0.09±0.020                             | 21±2.0        | 0.61±0.15           |
| TMP             | 0.11±0.010                             | 50±2.0        | 1.60±0.16           | 0.24±0.020                             | 29±2.0        | 1.05±0.10           | 0.10±0.030                             | 17±1.5        | 0.73±0.11           |

Experiments were done in the Bioscreen Growth Analyser as described above. Presented data are mean ± SD from three independent experiments. The apparent lag phase was calculated as a time period from the inoculation of the culture until the OD (600 nm) was 0.1.

**Table S4.** Muropeptides and sugars tested in TMP growth assays.

| Substance                                     | Source                    | Concentration            | Effect                                  |
|-----------------------------------------------|---------------------------|--------------------------|-----------------------------------------|
| D-glucose                                     | Sigma                     | Up to 5 mM               | No effect                               |
| N-acetylglucosamine (GlcNAc)                  | Sigma                     | Up to 5 mM               | No effect                               |
| N-acetylmuramic acid (MurNAc)                 | Sigma                     | Up to 5 mM               | No effect                               |
| GlcNAc-MurNAc disaccharide                    | Sigma                     | Up to 100 $\mu$ M        | No effect                               |
| MurNAc--dipeptide                             | Sigma                     | Up to 100 $\mu$ M        | No effect                               |
| MurNAc-pentapeptide                           | Synthesised in laboratory | Up to 75 $\mu$ M         | No effect                               |
| GlcNAc-MurNAc--pentapeptide                   | Synthesised in laboratory | Up to 75 $\mu$ M         | No effect                               |
| GlcNAc-1,6 anhydroMurNAc-pentapeptide         | Synthesised in laboratory | Up to 75 $\mu$ M         | No effect                               |
| Tetrasaccharide- pentapeptide                 | Synthesised in laboratory | Up to 75 $\mu$ M         | No effect                               |
| Sonicated <i>Mtb</i> PG                       | Isolated in laboratory    | Up to 1 mg/ml            | 20% reduction of lag-phase at 0.5 mg/ml |
| <i>E. coli</i> PG                             | Isolated in laboratory    | Up to 1 mg/ml            | 20% reduction of lag-phase at 0.5 mg/ml |
| Lysozyme-digested <i>E. coli</i> PG           | Isolated in laboratory    | Up to 1 mg/ml            | 20% reduction of lag-phase at 0.5 mg/ml |
| Mutanolysin-digested <i>E. coli</i> PG        | Isolated in laboratory    | Up to 1 mg/ml            | 20% reduction of lag-phase at 0.5 mg/ml |
| MltA-digested <i>E. coli</i> PG               | Isolated in laboratory    | Up to 0.2 mg/ml          | No effect                               |
| RpfB-digested <i>E. coli</i> PG               | Isolated in laboratory    | Up to 1 mg/ml            | 20% reduction of lag-phase at 0.5 mg/ml |
| Sonicated <i>M. smegmatis</i> PG              | Isolated in laboratory    | Up to 1 mg/ml            | 20% reduction of lag-phase at 0.5 mg/ml |
| RpfB-digested <i>M. smegmatis</i> PG          | Isolated in laboratory    | Up to 1 mg/ml            | 20% reduction of lag-phase at 0.5 mg/ml |
| Culture supernatant (Sauton's medium)         | Prepared in laboratory    | Up to 5fold concentrated | Complete elimination of inhibition      |
| Culture supernatant (7H9 supplemented medium) | Prepared in laboratory    | Up to 5fold concentrated | Complete elimination of inhibition      |

PG – peptidoglycan
